# Supplementary material for: Knowledge, attitudes and practices of primary healthcare professionals to female genital mutilation in Valencia, Spain: are we ready for this challenge?
Source: PubMed Central journal article supplement (PMC6057065; doi:10.1186/s12913-018-3396-z), 2018-07-24
Supplement: 12913_2018_3396_MOESM1_ESM.pdf [file 12913_2018_3396_MOESM1_ESM.pdf]

## MULTIVARIATE ANALYSIS HEALTHCARE PROFESSIONALS

### TRAINING VARIABLE

```
. tab Formacion
```

| Formacion   | Freq. | Percent | Cum.   |
|-------------|-------|---------|--------|
| -----+----- |       |         |        |
| No          | 314   | 97.82   | 97.82  |
| Si          | 7     | 2.18    | 100.00 |
| -----+----- |       |         |        |
| Total       | 321   | 100.00  |        |

```
. xi:logistic Formacion i.sexo i.edadgroup i.I4Profesin
```

```
i.sexo          _Isexo_1-2          (naturally coded; _Isexo_1 omitted)
```

```
i.edadgroup     _Iedadgroup_1-3     (naturally coded; _Iedadgroup_1 omitted)
```

```
i.I4Profesin   _II4Profesi_1-11   (naturally coded; _II4Profesi_1 omitted)
```

```
note: _Iedadgroup_2 != 0 predicts failure perfectly
```

```
      _Iedadgroup_2 dropped and 67 obs not used
```

```
note: _Iedadgroup_3 != 1 predicts failure perfectly
```

```
      _Iedadgroup_3 dropped and 41 obs not used
```

```
note: _II4Profesi_2 != 0 predicts failure perfectly
```

```
      _II4Profesi_2 dropped and 1 obs not used
```

```
note: _II4Profesi_6 != 0 predicts failure perfectly
```

```
      _II4Profesi_6 dropped and 5 obs not used
```

```
note: _II4Profesi_11 != 0 predicts failure perfectly
```

```
      _II4Profesi_11 dropped and 1 obs not used
```

Alba González-Timoneda et al.  
 Knowledge, attitudes and practices of Primary Healthcare Professionals to Female Genital Mutilation in Valencia,  
 Spain: are we ready for this challenge?  
 HEALTHCARE PROFESSIONALS. RESULTS\_MULTIVARIATE ANALYSIS.

```

Logistic regression          Number of obs   =       171
                             LR chi2(4)             =         7.17
                             Prob > chi2            =         0.1273
Log likelihood = -22.409645   Pseudo R2       =         0.1379
  
```

```

-----+-----
      Formacion | Odds Ratio   Std. Err.      z    P>|z|    [95% Conf. Interval]
-----+-----
      _Isexo_2 |   .5187199   .5390697    -0.63   0.528    .067661   3.976745
      _Iedadgroup_2 |           1 (omitted)
      _Iedadgroup_3 |           1 (omitted)
      _II4Profesi_2 |           1 (omitted)
      _II4Profesi_3 |   2.90293   3.680194     0.84   0.401    .2419494   34.82961
      _II4Profesi_4 |   .5630458   .7098329    -0.46   0.649    .0475809    6.662776
      _II4Profesi_5 |  16.61525  20.59416     2.27   0.023    1.463745  188.6029
      _II4Profesi_6 |           1 (omitted)
      _II4Profesi_11 |           1 (omitted)
      _cons |   .0386758   .0326466    -3.85   0.000    .0073949    .2022773
-----+-----
  
```

## CASES DETECTED

```
. tab Deteccion_casos
```

```

Deteccion_c |
      asos |      Freq.    Percent    Cum.
-----+-----
      No |      306     95.33     95.33
      Si |       15      4.67    100.00
-----+-----
      Total |      321    100.00
  
```

```
. xi:logistic Deteccion_casos i.sexo i.edadgroup i.II4Profesin
```

```

i.sexo          _Isexo_1-2      (naturally coded; _Isexo_1 omitted)
i.edadgroup     _Iedadgroup_1-3  (naturally coded; _Iedadgroup_1 omitted)
i.II4Profesin   _II4Profesi_1-11 (naturally coded; _II4Profesi_1 omitted)
  
```

```
note: _II4Profesi_2 != 0 predicts failure perfectly
```

Alba González-Timoneda et al.  
 Knowledge, attitudes and practices of Primary Healthcare Professionals to Female Genital Mutilation in Valencia,  
 Spain: are we ready for this challenge?  
 HEALTHCARE PROFESSIONALS. RESULTS\_MULTIVARIATE ANALYSIS.

\_II4Profesi\_2 dropped and 1 obs not used

note: \_II4Profesi\_11 != 0 predicts failure perfectly

\_II4Profesi\_11 dropped and 1 obs not used

```

Logistic regression                                Number of obs   =          284
                                                    LR chi2(7)      =          15.37
                                                    Prob > chi2     =          0.0316
Log likelihood = -42.028448                       Pseudo R2      =          0.1546
  
```

| Deteccion_casos | Odds Ratio | Std. Err. | z     | P> z  | [95% Conf. Interval] |          |
|-----------------|------------|-----------|-------|-------|----------------------|----------|
| _Isexo_2        | .4641893   | .3652123  | -0.98 | 0.329 | .0993097             | 2.169695 |
| _Iedadgroup_2   | .6586704   | .7296886  | -0.38 | 0.706 | .0751086             | 5.776259 |
| _Iedadgroup_3   | .8619662   | .7626295  | -0.17 | 0.867 | .1521896             | 4.881976 |
| _II4Profesi_2   | 1          | (omitted) |       |       |                      |          |
| _II4Profesi_3   | 2.558102   | 3.218139  | 0.75  | 0.455 | .2173156             | 30.11237 |
| _II4Profesi_4   | 1.89473    | 1.713295  | 0.71  | 0.480 | .3219992             | 11.1491  |
| _II4Profesi_5   | 40.84208   | 43.03854  | 3.52  | 0.000 | 5.177608             | 322.171  |
| _II4Profesi_6   | 7.450518   | 9.962604  | 1.50  | 0.133 | .5419834             | 102.4205 |
| _II4Profesi_11  | 1          | (omitted) |       |       |                      |          |
| _cons           | .0348258   | .0389862  | -3.00 | 0.003 | .0038816             | .3124557 |

## ATTITUDES

### Educate and Sensitize

. tab I121

```

Formar y |
sensibiliza |
           r |      Freq.   Percent   Cum.
-----+-----
           0 |          36    11.21    11.21
  
```

Alba González-Timoneda et al.  
 Knowledge, attitudes and practices of Primary Healthcare Professionals to Female Genital Mutilation in Valencia,  
 Spain: are we ready for this challenge?  
 HEALTHCARE PROFESSIONALS. RESULTS\_MULTIVARIATE ANALYSIS.

|             |     |        |        |
|-------------|-----|--------|--------|
| 1           | 285 | 88.79  | 100.00 |
| -----+----- |     |        |        |
| Total       | 321 | 100.00 |        |

```
. xi:logistic I121 i.sexo i.edadgroup i.I4Profesin
i.sexo      _Isexo_1-2      (naturally coded; _Isexo_1 omitted)
i.edadgroup  _Iedadgroup_1-3  (naturally coded; _Iedadgroup_1 omitted)
i.I4Profesin  _II4Profesi_1-11  (naturally coded; _II4Profesi_1 omitted)
```

```
note: _II4Profesi_2 != 0 predicts success perfectly
      _II4Profesi_2 dropped and 1 obs not used
```

```
note: _II4Profesi_5 != 0 predicts success perfectly
      _II4Profesi_5 dropped and 11 obs not used
```

```
note: _II4Profesi_6 != 0 predicts success perfectly
      _II4Profesi_6 dropped and 11 obs not used
```

```
note: _II4Profesi_11 != 0 predicts success perfectly
      _II4Profesi_11 dropped and 1 obs not used
```

|                             |               |   |        |
|-----------------------------|---------------|---|--------|
| Logistic regression         | Number of obs | = | 262    |
|                             | LR chi2(5)    | = | 5.85   |
|                             | Prob > chi2   | = | 0.3211 |
| Log likelihood = -92.329419 | Pseudo R2     | = | 0.0307 |

|  | I121   Odds Ratio | Std. Err. | z         | P> z  | [95% Conf. Interval] |                   |
|--|-------------------|-----------|-----------|-------|----------------------|-------------------|
|  | _Isexo_2          | 1.388033  | .6154235  | 0.74  | 0.460                | .5820977 3.309817 |
|  | _Iedadgroup_2     | .6019141  | .3887362  | -0.79 | 0.432                | .1697463 2.134366 |
|  | _Iedadgroup_3     | .8404449  | .4992279  | -0.29 | 0.770                | .2623565 2.69232  |
|  | _II4Profesi_2     | 1         | (omitted) |       |                      |                   |
|  | _II4Profesi_3     | 2.16371   | 2.344528  | 0.71  | 0.476                | .2587401 18.09398 |
|  | _II4Profesi_4     | .4803501  | .2102777  | -1.67 | 0.094                | .2036745 1.132868 |
|  | _II4Profesi_5     | 1         | (omitted) |       |                      |                   |
|  | _II4Profesi_6     | 1         | (omitted) |       |                      |                   |

Alba González-Timoneda et al.  
 Knowledge, attitudes and practices of Primary Healthcare Professionals to Female Genital Mutilation in Valencia,  
 Spain: are we ready for this challenge?  
 HEALTHCARE PROFESSIONALS. RESULTS\_MULTIVARIATE ANALYSIS.

```

_II4Profesi_11 |          1 (omitted)
      _cons |   10.90358   7.513997   3.47   0.001   2.824747   42.08803
-----+-----
  
```

## Condemn and report

```
. tab I122
```

```

Condenar y |
denunciar |      Freq.   Percent   Cum.
-----+-----
      0 |         190     59.19     59.19
      1 |         131     40.81    100.00
-----+-----
    Total |         321    100.00
  
```

```
. xi:logistic I122 i.sexo i.edadgroup i.I4Profesin
```

```

i.sexo          _Isexo_1-2      (naturally coded; _Isexo_1 omitted)
i.edadgroup     _Iedadgroup_1-3  (naturally coded; _Iedadgroup_1 omitted)
i.I4Profesin    _II4Profesi_1-11  (naturally coded; _II4Profesi_1 omitted)
  
```

```

note: _II4Profesi_2 != 0 predicts failure perfectly
      _II4Profesi_2 dropped and 1 obs not used
  
```

```

note: _II4Profesi_11 != 0 predicts success perfectly
      _II4Profesi_11 dropped and 1 obs not used
  
```

```

Logistic regression                Number of obs   =       284
                                   LR chi2(7)         =         6.98
                                   Prob > chi2        =       0.4305
Log likelihood = -189.61955         Pseudo R2       =       0.0181
  
```

```

-----+-----
      I122 | Odds Ratio   Std. Err.      z    P>|z|    [95% Conf. Interval]
-----+-----
      _Isexo_2 |   .9984929   .2914242    -0.01   0.996   .5635207   1.769213
      _Iedadgroup_2 |   .4365718   .1793359    -2.02   0.044   .1951629   .9765939
  
```

|                |  |          |           |       |       |          |          |
|----------------|--|----------|-----------|-------|-------|----------|----------|
| _Iedadgroup_3  |  | .4447597 | .1596391  | -2.26 | 0.024 | .2200903 | .8987732 |
| _II4Profesi_2  |  | 1        | (omitted) |       |       |          |          |
| _II4Profesi_3  |  | 1.096392 | .5060669  | 0.20  | 0.842 | .4436828 | 2.709312 |
| _II4Profesi_4  |  | .8802505 | .2426748  | -0.46 | 0.644 | .5127904 | 1.511028 |
| _II4Profesi_5  |  | .452972  | .3278236  | -1.09 | 0.274 | .1096584 | 1.871115 |
| _II4Profesi_6  |  | .8228683 | .5518824  | -0.29 | 0.771 | .221027  | 3.063482 |
| _II4Profesi_11 |  | 1        | (omitted) |       |       |          |          |
| _cons          |  | 1.579422 | .6656278  | 1.08  | 0.278 | .6914642 | 3.607668 |

### Educate and condemn

. tab I123b

| I123b | Freq. | Percent | Cum.   |
|-------|-------|---------|--------|
| 0     | 208   | 64.80   | 64.80  |
| 1     | 113   | 35.20   | 100.00 |
| Total | 321   | 100.00  |        |

. xi:logistic I123b i.sexo i.edadgroup i.I4Profesin

i.sexo            \_Isexo\_1-2           (naturally coded; \_Isexo\_1 omitted)  
i.edadgroup       \_Iedadgroup\_1-3       (naturally coded; \_Iedadgroup\_1 omitted)  
i.I4Profesin       \_II4Profesi\_1-11       (naturally coded; \_II4Profesi\_1 omitted)

note: \_II4Profesi\_2 != 0 predicts failure perfectly  
      \_II4Profesi\_2 dropped and 1 obs not used

note: \_II4Profesi\_11 != 0 predicts success perfectly  
      \_II4Profesi\_11 dropped and 1 obs not used

|                             |               |   |        |
|-----------------------------|---------------|---|--------|
| Logistic regression         | Number of obs | = | 284    |
|                             | LR chi2(7)    | = | 6.28   |
|                             | Prob > chi2   | = | 0.5069 |
| Log likelihood = -182.86129 | Pseudo R2     | = | 0.0169 |

| I123b | Odds Ratio | Std. Err. | z | P> z | [95% Conf. Interval] |
|-------|------------|-----------|---|------|----------------------|
|-------|------------|-----------|---|------|----------------------|

Alba González-Timoneda et al.  
 Knowledge, attitudes and practices of Primary Healthcare Professionals to Female Genital Mutilation in Valencia,  
 Spain: are we ready for this challenge?  
 HEALTHCARE PROFESSIONALS. RESULTS\_MULTIVARIATE ANALYSIS.

```
-----+-----
```

|                |  |          |           |       |       |          |          |
|----------------|--|----------|-----------|-------|-------|----------|----------|
| _Isexo_2       |  | 1.064534 | .3190819  | 0.21  | 0.835 | .5915915 | 1.915568 |
| _Iedadgroup_2  |  | .4482597 | .1869535  | -1.92 | 0.054 | .1979353 | 1.015164 |
| _Iedadgroup_3  |  | .5321901 | .1903714  | -1.76 | 0.078 | .2639859 | 1.072884 |
| _II4Profesi_2  |  | 1        | (omitted) |       |       |          |          |
| _II4Profesi_3  |  | 1.052502 | .4903058  | 0.11  | 0.913 | .4223694 | 2.622728 |
| _II4Profesi_4  |  | .6794556 | .1923856  | -1.36 | 0.172 | .3900732 | 1.183521 |
| _II4Profesi_5  |  | .501523  | .3619097  | -0.96 | 0.339 | .1219118 | 2.063175 |
| _II4Profesi_6  |  | .9440261 | .6347321  | -0.09 | 0.932 | .2527342 | 3.526175 |
| _II4Profesi_11 |  | 1        | (omitted) |       |       |          |          |
| _cons          |  | 1.178943 | .4977756  | 0.39  | 0.697 | .5153434 | 2.697049 |

```
-----+-----
```

## Control

```
. tab I124
```

| Control | Freq. | Percent | Cum.   |
|---------|-------|---------|--------|
| 0       | 207   | 64.49   | 64.49  |
| 1       | 114   | 35.51   | 100.00 |
| Total   | 321   | 100.00  |        |

```
. xi:logistic I124 i.sexo i.edadgroup i.I4Profesin
```

```
i.sexo      _Isexo_1-2      (naturally coded; _Isexo_1 omitted)
i.edadgroup  _Iedadgroup_1-3  (naturally coded; _Iedadgroup_1 omitted)
i.I4Profesin  _II4Profesi_1-11  (naturally coded; _II4Profesi_1 omitted)
```

```
note: _II4Profesi_2 != 0 predicts success perfectly
```

```
_II4Profesi_2 dropped and 1 obs not used
```

```
note: _II4Profesi_11 != 0 predicts success perfectly
```

```
_II4Profesi_11 dropped and 1 obs not used
```

```
Logistic regression      Number of obs =      284
                          LR chi2(7) =      10.03
```

Alba González-Timoneda et al.  
 Knowledge, attitudes and practices of Primary Healthcare Professionals to Female Genital Mutilation in Valencia,  
 Spain: are we ready for this challenge?  
 HEALTHCARE PROFESSIONALS. RESULTS\_MULTIVARIATE ANALYSIS.

Prob > chi2 = 0.1869  
 Pseudo R2 = 0.0270

Log likelihood = -180.98922

| I124           | Odds Ratio | Std. Err. | z     | P> z  | [95% Conf. Interval] |          |
|----------------|------------|-----------|-------|-------|----------------------|----------|
| _Isexo_2       | 1.172498   | .3536163  | 0.53  | 0.598 | .6492268             | 2.117522 |
| _Iedadgroup_2  | 2.809282   | 1.283579  | 2.26  | 0.024 | 1.147298             | 6.878832 |
| _Iedadgroup_3  | 2.016541   | .8370929  | 1.69  | 0.091 | .8938444             | 4.549379 |
| _II4Profesi_2  | 1          | (omitted) |       |       |                      |          |
| _II4Profesi_3  | 1.544104   | .7142649  | 0.94  | 0.348 | .6236362             | 3.823153 |
| _II4Profesi_4  | .8008109   | .2267999  | -0.78 | 0.433 | .4596834             | 1.395087 |
| _II4Profesi_5  | .3575289   | .2932245  | -1.25 | 0.210 | .0716481             | 1.784093 |
| _II4Profesi_6  | .7224628   | .4876513  | -0.48 | 0.630 | .1924277             | 2.712461 |
| _II4Profesi_11 | 1          | (omitted) |       |       |                      |          |
| _cons          | .2818755   | .1337123  | -2.67 | 0.008 | .1112438             | .7142315 |

## CORRECTLY IDENTIFY CASES AT RISK

. tab DetectaCRcorrecto

| DetectaCRco | Freq. | Percent | Cum.   |
|-------------|-------|---------|--------|
| recto       |       |         |        |
| No          | 212   | 66.04   | 66.04  |
| Si          | 109   | 33.96   | 100.00 |
| Total       | 321   | 100.00  |        |

. xi:logistic DetectaCRcorrecto i.sexo i.edadgroup i.I4Profesin

i.sexo           \_Isexo\_1-2           (naturally coded; \_Isexo\_1 omitted)  
 i.edadgroup     \_Iedadgroup\_1-3   (naturally coded; \_Iedadgroup\_1 omitted)  
 i.I4Profesin    \_II4Profesi\_1-11   (naturally coded; \_II4Profesi\_1 omitted)

note: \_II4Profesi\_2 != 0 predicts failure perfectly

\_II4Profesi\_2 dropped and 1 obs not used

note: \_II4Profesi\_11 != 0 predicts failure perfectly



Alba González-Timoneda et al.  
 Knowledge, attitudes and practices of Primary Healthcare Professionals to Female Genital Mutilation in Valencia,  
 Spain: are we ready for this challenge?  
 HEALTHCARE PROFESSIONALS. RESULTS\_MULTIVARIATE ANALYSIS.

\_II4Profesi\_11 dropped and 1 obs not used

```

Logistic regression                               Number of obs   =       284
                                                    LR chi2(7)      =         7.08
                                                    Prob > chi2     =       0.4211
Log likelihood = -180.70578                       Pseudo R2      =       0.0192
  
```

| -----+----- | DetectaCRcorrecto | Odds Ratio | Std. Err. | z     | P> z  | [95% Conf. Interval] |
|-------------|-------------------|------------|-----------|-------|-------|----------------------|
| -----+----- |                   |            |           |       |       |                      |
|             | _Isexo_2          | .7786095   | .2353807  | -0.83 | 0.408 | .4305205 1.408139    |
|             | _Iedadgroup_2     | .6976788   | .2961277  | -0.85 | 0.396 | .3036446 1.603044    |
|             | _Iedadgroup_3     | .8928601   | .3258448  | -0.31 | 0.756 | .4366583 1.825682    |
|             | _II4Profesi_2     | 1          | (omitted) |       |       |                      |
|             | _II4Profesi_3     | 1.965921   | .9305625  | 1.43  | 0.153 | .7774141 4.97141     |
|             | _II4Profesi_4     | 1.639373   | .4804858  | 1.69  | 0.092 | .9229921 2.911773    |
|             | _II4Profesi_5     | 3.333966   | 2.191137  | 1.83  | 0.067 | .9194701 12.08884    |
|             | _II4Profesi_6     | 2.581355   | 1.709585  | 1.43  | 0.152 | .7048754 9.453296    |
|             | _II4Profesi_11    | 1          | (omitted) |       |       |                      |
|             | _cons             | .5188295   | .2248849  | -1.51 | 0.130 | .2218575 1.21332     |

## KNOWLEDGE OF PROTOCOL OF ACTION

. tab protocolo

| -----+----- | protocolo | Freq. | Percent | Cum.   |
|-------------|-----------|-------|---------|--------|
| -----+----- | No        | 299   | 93.15   | 93.15  |
|             | Si        | 22    | 6.85    | 100.00 |
| -----+----- | Total     | 321   | 100.00  |        |

```
. xi:logistic protocolo i.sexo i.edadgroup i.I4Profesin
i.sexo          _Isexo_1-2          (naturally coded; _Isexo_1 omitted)
i.edadgroup     _Iedadgroup_1-3     (naturally coded; _Iedadgroup_1 omitted)
i.I4Profesin    _II4Profesi_1-11    (naturally coded; _II4Profesi_1 omitted)
note: _II4Profesi_2 != 0 predicts success perfectly
      _II4Profesi_2 dropped and 1 obs not used

note: _II4Profesi_11 != 0 predicts failure perfectly
      _II4Profesi_11 dropped and 1 obs not used
```

```
Logistic regression          Number of obs   =          284
                              LR chi2(7)         =          34.91
                              Prob > chi2        =          0.0000
Log likelihood = -54.889302   Pseudo R2      =          0.2413
```

| protocolo      | Odds Ratio  | Std. Err. | z     | P> z  | [95% Conf. Interval] |          |
|----------------|-------------|-----------|-------|-------|----------------------|----------|
| _Isexo_2       | 1.231757    | .8946765  | 0.29  | 0.774 | .2966619             | 5.114324 |
| _Iedadgroup_2  | 1.142987    | .9822415  | 0.16  | 0.876 | .2121045             | 6.159322 |
| _Iedadgroup_3  | .7461473    | .5811564  | -0.38 | 0.707 | .1621227             | 3.434039 |
| _II4Profesi_2  | 1 (omitted) |           |       |       |                      |          |
| _II4Profesi_3  | 12.9298     | 9.631518  | 3.44  | 0.001 | 3.002787             | 55.67485 |
| _II4Profesi_4  | .7001704    | .5885958  | -0.42 | 0.672 | .1347858             | 3.637168 |
| _II4Profesi_5  | 26.89961    | 23.80586  | 3.72  | 0.000 | 4.747247             | 152.4228 |
| _II4Profesi_6  | 6.241757    | 6.357464  | 1.80  | 0.072 | .8478639             | 45.95022 |
| _II4Profesi_11 | 1 (omitted) |           |       |       |                      |          |
| _cons          | .030722     | .0319279  | -3.35 | 0.001 | .0040072             | .2355386 |

## Multivariate ANALYSIS\_ TRAINING VARIABLE AS INDEPENDENT

\_Igruposani\_1=Etapa adulto

\_Igruposani\_2=Etapa perimaternal

\_Igruposani\_3=Trabajador social y otros

## TRAINING

```
. xi:logistic Formacion i.sexo i.edadgroup i.gruposanitario
i.sexo          _Isexo_1-2          (naturally coded; _Isexo_1 omitted)
i.edadgroup     _Iedadgroup_1-3     (naturally coded; _Iedadgroup_1 omitted)
i.gruposanita~o _Igruposani_1-3     (naturally coded; _Igruposani_1 omitted)
note: _Iedadgroup_2 != 0 predicts failure perfectly
      _Iedadgroup_2 dropped and 67 obs not used

note: _Iedadgroup_3 != 1 predicts failure perfectly
      _Iedadgroup_3 dropped and 41 obs not used

note: _Igruposani_3 != 0 predicts failure perfectly
      _Igruposani_3 dropped and 6 obs not used
```

```
Logistic regression          Number of obs   =          172
                             LR chi2(2)         =           4.94
                             Prob > chi2        =          0.0847
Log likelihood = -23.560008   Pseudo R2      =          0.0948
```

| Formacion     | Odds Ratio | Std. Err. | z     | P> z  | [95% Conf. Interval] |          |
|---------------|------------|-----------|-------|-------|----------------------|----------|
| _Isexo_2      | .7949539   | .7191152  | -0.25 | 0.800 | .1350035             | 4.681001 |
| _Iedadgroup_2 | 1          | (omitted) |       |       |                      |          |
| _Iedadgroup_3 | 1          | (omitted) |       |       |                      |          |
| _Igruposani_2 | 7.40517    | 6.318887  | 2.35  | 0.019 | 1.390587             | 39.43408 |
| _Igruposani_3 | 1          | (omitted) |       |       |                      |          |
| _cons         | .0239091   | .019578   | -4.56 | 0.000 | .0048035             | .1190066 |

## CASES DETECTED

```
. xi:logistic Deteccion_casos i.sexo i.edadgroup i.gruposanitario
i.sexo          _Isexo_1-2          (naturally coded; _Isexo_1 omitted)
i.edadgroup     _Iedadgroup_1-3     (naturally coded; _Iedadgroup_1 omitted)
i.gruposanita~o _Igruposani_1-3     (naturally coded; _Igruposani_1 omitted)
```

Alba González-Timoneda et al.  
 Knowledge, attitudes and practices of Primary Healthcare Professionals to Female Genital Mutilation in Valencia,  
 Spain: are we ready for this challenge?  
 HEALTHCARE PROFESSIONALS. RESULTS\_MULTIVARIATE ANALYSIS.

```

Logistic regression                                Number of obs   =      286
                                                    LR chi2(5)      =      8.26
                                                    Prob > chi2     =      0.1426
Log likelihood = -45.66879                        Pseudo R2      =      0.0829
  
```

```

-----+-----
Deteccion_casos | Odds Ratio   Std. Err.      z    P>|z|    [95% Conf. Interval]
-----+-----
      _Isexo_2 |   .8665918   .6184452   -0.20   0.841   .2139699   3.509752
      _Iedadgroup_2 |   .5003096   .530944   -0.65   0.514   .0625054   4.00461
      _Iedadgroup_3 |   .8166313   .6892449   -0.24   0.810   .1561721   4.270204
      _Igruposani_2 |   6.360202   4.070662    2.89   0.004   1.814195   22.29758
      _Igruposani_3 |   4.256411   4.930474    1.25   0.211   .4395842   41.21402
           _cons |   .0370475   .0363492   -3.36   0.001   .005415   .2534641
-----+-----
  
```

```

. xi:logistic Deteccion_casos i.sexo i.edadgroup i.gruposanitario i.Formacion
i.sexo          _Isexo_1-2          (naturally coded; _Isexo_1 omitted)
i.edadgroup     _Iedadgroup_1-3     (naturally coded; _Iedadgroup_1 omitted)
i.gruposanita~o _Igruposani_1-3     (naturally coded; _Igruposani_1 omitted)
i.Formacion     _IFormacion_0-1     (naturally coded; _IFormacion_0 omitted)
  
```

```

Logistic regression                                Number of obs   =      286
                                                    LR chi2(6)      =     11.89
                                                    Prob > chi2     =      0.0644
Log likelihood = -43.851512                        Pseudo R2      =      0.1194
  
```

```

-----+-----
Deteccion_casos | Odds Ratio   Std. Err.      z    P>|z|    [95% Conf. Interval]
-----+-----
      _Isexo_2 |   .7943933   .5773132   -0.32   0.751   .191178   3.300907
      _Iedadgroup_2 |   .4880637   .5184977   -0.68   0.500   .0608411   3.91522
      _Iedadgroup_3 |   .6265638   .5436059   -0.54   0.590   .11441   3.431362
      _Igruposani_2 |   5.161862   3.487362    2.43   0.015   1.373198   19.40347
      _Igruposani_3 |   4.662287   5.456939    1.32   0.188   .4702365   46.22549
      _IFormacion_1 |   8.629604   8.889133    2.09   0.036   1.146014   64.98179
-----+-----
  
```

Alba González-Timoneda et al.  
 Knowledge, attitudes and practices of Primary Healthcare Professionals to Female Genital Mutilation in Valencia,  
 Spain: are we ready for this challenge?  
 HEALTHCARE PROFESSIONALS. RESULTS\_MULTIVARIATE ANALYSIS.

```
_cons | .0430947 .0415951 -3.26 0.001 .0064989 .2857629
```

## 1.1 I12ACTIVIDADES

### Formar y sensibilizar

```
. xi:logistic I121 i.sexo i.edadgroup i.gruposanitario
i.sexo          _Isexo_1-2          (naturally coded; _Isexo_1 omitted)
i.edadgroup     _Iedadgroup_1-3     (naturally coded; _Iedadgroup_1 omitted)
i.gruposanita~o _Igruposani_1-3     (naturally coded; _Igruposani_1 omitted)
note: _Igruposani_3 != 0 predicts success perfectly
      _Igruposani_3 dropped and 12 obs not used
```

```
Logistic regression          Number of obs   =          274
                             LR chi2(4)           =           5.08
                             Prob > chi2          =          0.2794
Log likelihood = -94.190476   Pseudo R2      =          0.0262
```

| I121          | Odds Ratio | Std. Err. | z     | P> z  | [95% Conf. Interval] |          |
|---------------|------------|-----------|-------|-------|----------------------|----------|
| _Isexo_2      | 1.190818   | .5120576  | 0.41  | 0.685 | .5126544             | 2.766089 |
| _Iedadgroup_2 | .6152497   | .3949307  | -0.76 | 0.449 | .1748487             | 2.164912 |
| _Iedadgroup_3 | .9345678   | .5494812  | -0.12 | 0.908 | .2952194             | 2.958535 |
| _Igruposani_2 | 5.005007   | 5.175253  | 1.56  | 0.119 | .6595523             | 37.98045 |
| _Igruposani_3 | 1          | (omitted) |       |       |                      |          |
| _cons         | 7.193141   | 4.523492  | 3.14  | 0.002 | 2.097154             | 24.67214 |

```
. xi:logistic I121 i.sexo i.edadgroup i.gruposanitario i.Formacion
i.sexo          _Isexo_1-2          (naturally coded; _Isexo_1 omitted)
i.edadgroup     _Iedadgroup_1-3     (naturally coded; _Iedadgroup_1 omitted)
i.gruposanita~o _Igruposani_1-3     (naturally coded; _Igruposani_1 omitted)
i.Formacion     _IFormacion_0-1     (naturally coded; _IFormacion_0 omitted)
note: _Igruposani_3 != 0 predicts success perfectly
```

Alba González-Timoneda et al.  
 Knowledge, attitudes and practices of Primary Healthcare Professionals to Female Genital Mutilation in Valencia,  
 Spain: are we ready for this challenge?  
 HEALTHCARE PROFESSIONALS. RESULTS\_MULTIVARIATE ANALYSIS.

\_Igruposani\_3 dropped and 12 obs not used

```

Logistic regression                                Number of obs   =      274
                                                    LR chi2(5)      =      5.71
                                                    Prob > chi2     =      0.3352
Log likelihood = -93.873234                       Pseudo R2       =      0.0295
  
```

|               | I121 | Odds Ratio | Std. Err. | z     | P> z  | [95% Conf. Interval] |
|---------------|------|------------|-----------|-------|-------|----------------------|
| _Isexo_2      |      | 1.161916   | .5031317  | 0.35  | 0.729 | .4972653 2.714946    |
| _Iedadgroup_2 |      | .6149053   | .3948017  | -0.76 | 0.449 | .1746996 2.164335    |
| _Iedadgroup_3 |      | .9660572   | .5706342  | -0.06 | 0.953 | .3035372 3.074636    |
| _Igruposani_2 |      | 5.552191   | 5.836293  | 1.63  | 0.103 | .7074691 43.57339    |
| _Igruposani_3 |      | 1          | (omitted) |       |       |                      |
| _IFormacion_1 |      | .355171    | .4241773  | -0.87 | 0.386 | .0341866 3.68994     |
| _cons         |      | 7.31178    | 4.608684  | 3.16  | 0.002 | 2.125704 25.15032    |

### Condenar y denunciar

```

. xi:logistic I122 i.sexo i.edadgroup i.gruposanitario
i.sexo          _Isexo_1-2      (naturally coded; _Isexo_1 omitted)
i.edadgroup     _Iedadgroup_1-3 (naturally coded; _Iedadgroup_1 omitted)
i.gruposanita~o _Igruposani_1-3 (naturally coded; _Igruposani_1 omitted)
  
```

```

Logistic regression                                Number of obs   =      286
                                                    LR chi2(5)      =      5.52
                                                    Prob > chi2     =      0.3554
Log likelihood = -191.76292                       Pseudo R2       =      0.0142
  
```

|               | I122 | Odds Ratio | Std. Err. | z     | P> z  | [95% Conf. Interval] |
|---------------|------|------------|-----------|-------|-------|----------------------|
| _Isexo_2      |      | .9708693   | .2749439  | -0.10 | 0.917 | .5573217 1.69128     |
| _Iedadgroup_2 |      | .4447866   | .1815034  | -1.99 | 0.047 | .1998956 .9896923    |
| _Iedadgroup_3 |      | .4559695   | .1619468  | -2.21 | 0.027 | .2273078 .914655     |
| _Igruposani_2 |      | .8713542   | .3226843  | -0.37 | 0.710 | .4216708 1.800595    |

```

_Igruposani_3 | 1.107404 .6740677 0.17 0.867 .3358822 3.651115
  _cons | 1.471571 .582522 0.98 0.329 .6773806 3.196905

```

```

. xi:logistic I122 i.sexo i.edadgroup i.gruposanitario i.Formacion
i.sexo      _Isexo_1-2      (naturally coded; _Isexo_1 omitted)
i.edadgroup  _Iedadgroup_1-3 (naturally coded; _Iedadgroup_1 omitted)
i.gruposanita~o  _Igruposani_1-3 (naturally coded; _Igruposani_1 omitted)
i.Formacion  _IFormacion_0-1 (naturally coded; _IFormacion_0 omitted)

```

```

Logistic regression                Number of obs   =       286
                                   LR chi2(6)         =       7.67
                                   Prob > chi2        =       0.2634
Log likelihood = -190.69067         Pseudo R2       =       0.0197

```

```

-----+-----
          I122 | Odds Ratio   Std. Err.      z    P>|z|    [95% Conf. Interval]
-----+-----
      _Isexo_2 | .9781002    .2784276    -0.08  0.938    .5598593    1.708786
  _Iedadgroup_2 | .4439237    .18125     -1.99  0.047    .1994208    .9882031
  _Iedadgroup_3 | .4369264    .1558975    -2.32  0.020    .2171178    .8792678
  _Igruposani_2 | .7924303    .3013941    -0.61  0.541    .3760225    1.669968
  _Igruposani_3 | 1.118351    .6808737     0.18  0.854    .3391178    3.688129
  _IFormacion_1 | 3.535227    3.165222     1.41  0.158    .6113705    20.44232
      _cons | 1.479953    .5872142     0.99  0.323    .6800006    3.220971

```

## Formar y condenar

```

. xi:logistic I123b i.sexo i.edadgroup i.gruposanitario
i.sexo      _Isexo_1-2      (naturally coded; _Isexo_1 omitted)
i.edadgroup  _Iedadgroup_1-3 (naturally coded; _Iedadgroup_1 omitted)
i.gruposanita~o  _Igruposani_1-3 (naturally coded; _Igruposani_1 omitted)

Logistic regression                Number of obs   =       286
                                   LR chi2(5)         =       3.84
                                   Prob > chi2        =       0.5727
Log likelihood = -185.548         Pseudo R2       =       0.0102

```

Alba González-Timoneda et al.  
 Knowledge, attitudes and practices of Primary Healthcare Professionals to Female Genital Mutilation in Valencia,  
 Spain: are we ready for this challenge?  
 HEALTHCARE PROFESSIONALS. RESULTS\_MULTIVARIATE ANALYSIS.

```
-----
```

| I123b         | Odds Ratio | Std. Err. | z     | P> z  | [95% Conf. Interval] |          |
|---------------|------------|-----------|-------|-------|----------------------|----------|
| _Isexo_2      | .984321    | .2853235  | -0.05 | 0.957 | .5576996             | 1.737293 |
| _Iedadgroup_2 | .4622812   | .1910725  | -1.87 | 0.062 | .2056284             | 1.039272 |
| _Iedadgroup_3 | .5662726   | .1997039  | -1.61 | 0.107 | .2836857             | 1.130352 |
| _Igruposani_2 | 1.00759    | .3783072  | 0.02  | 0.984 | .482718              | 2.103167 |
| _Igruposani_3 | 1.467955   | .8971439  | 0.63  | 0.530 | .4430975             | 4.863248 |
| _cons         | .9640544   | .380971   | -0.09 | 0.926 | .4443521             | 2.091587 |

```
-----
```

```
. xi:logistic I123b i.sexo i.edadgroup i.gruposanitario i.Formacion
i.sexo          _Isexo_1-2          (naturally coded; _Isexo_1 omitted)
i.edadgroup     _Iedadgroup_1-3     (naturally coded; _Iedadgroup_1 omitted)
i.gruposanita~o _Igruposani_1-3     (naturally coded; _Igruposani_1 omitted)
i.Formacion     _IFormacion_0-1     (naturally coded; _IFormacion_0 omitted)

Logistic regression                                Number of obs   =       286
                                                    LR chi2(6)      =         4.43
                                                    Prob > chi2     =       0.6187
Log likelihood = -185.25266                       Pseudo R2      =       0.0118
```

```
-----
```

| I123b         | Odds Ratio | Std. Err. | z     | P> z  | [95% Conf. Interval] |          |
|---------------|------------|-----------|-------|-------|----------------------|----------|
| _Isexo_2      | .9885462   | .2870435  | -0.04 | 0.968 | .5595439             | 1.746465 |
| _Iedadgroup_2 | .4619072   | .190938   | -1.87 | 0.062 | .2054446             | 1.03852  |
| _Iedadgroup_3 | .5535589   | .1960119  | -1.67 | 0.095 | .2765403             | 1.108075 |
| _Igruposani_2 | .959148    | .3668405  | -0.11 | 0.913 | .4532427             | 2.02974  |
| _Igruposani_3 | 1.476143   | .9020695  | 0.64  | 0.524 | .4456152             | 4.889864 |
| _IFormacion_1 | 1.923364   | 1.625578  | 0.77  | 0.439 | .3669847             | 10.08034 |
| _cons         | .9664228   | .3820845  | -0.09 | 0.931 | .4452835             | 2.09748  |

```
-----
```

### Control

```
. xi:logistic I124 i.sexo i.edadgroup i.gruposanitario
i.sexo          _Isexo_1-2          (naturally coded; _Isexo_1 omitted)
```



```
i.edadgroup      _Iedadgroup_1-3      (naturally coded; _Iedadgroup_1 omitted)
i.gruposanita~o  _Igruposani_1-3      (naturally coded; _Igruposani_1 omitted)
```

```
Logistic regression      Number of obs   =      286
                          LR chi2(5)              =      6.46
                          Prob > chi2              =      0.2639
Log likelihood = -184.78902      Pseudo R2       =      0.0172
```

```
-----+-----
          I124 | Odds Ratio   Std. Err.      z    P>|z|     [95% Conf. Interval]
-----+-----
          _Isexo_2 |  1.029073   .2988892     0.10   0.921     .5823965   1.818333
    _Iedadgroup_2 |  2.87316    1.304051     2.33   0.020     1.180381   6.993548
    _Iedadgroup_3 |  2.097421   .8616918     1.80   0.071     .9375252   4.692325
    _Igruposani_2 |  1.279337   .4714773     0.67   0.504     .621283    2.634392
    _Igruposani_3 |  1.063222   .649385      0.10   0.920     .3211699   3.51976
          _cons   |  .266004    .1196862    -2.94   0.003     .1101279   .6425084
-----+-----
```

```
. xi:logistic I124 i.sexo i.edadgroup i.gruposanitario i.Formacion
i.sexo          _Isexo_1-2      (naturally coded; _Isexo_1 omitted)
i.edadgroup     _Iedadgroup_1-3 (naturally coded; _Iedadgroup_1 omitted)
i.gruposanita~o _Igruposani_1-3      (naturally coded; _Igruposani_1 omitted)
i.Formacion     _IFormacion_0-1 (naturally coded; _IFormacion_0 omitted)
```

```
Logistic regression      Number of obs   =      286
                          LR chi2(6)              =      6.56
                          Prob > chi2              =      0.3639
Log likelihood = -184.74187      Pseudo R2       =      0.0174
```

```
-----+-----
          I124 | Odds Ratio   Std. Err.      z    P>|z|     [95% Conf. Interval]
-----+-----
          _Isexo_2 |  1.027783   .2986078     0.09   0.925     .5815627   1.816377
    _Iedadgroup_2 |  2.874565   1.304839     2.33   0.020     1.180837   6.997684
    _Iedadgroup_3 |  2.116308   .8716441     1.82   0.069     .9440482   4.744204
    _Igruposani_2 |  1.304274   .4876774     0.71   0.477     .6267558   2.714183
```



Alba González-Timoneda et al.  
 Knowledge, attitudes and practices of Primary Healthcare Professionals to Female Genital Mutilation in Valencia,  
 Spain: are we ready for this challenge?  
 HEALTHCARE PROFESSIONALS. RESULTS\_MULTIVARIATE ANALYSIS.

|                             |             |   |        |
|-----------------------------|-------------|---|--------|
|                             | Prob > chi2 | = | 0.8076 |
| Log likelihood = -183.60296 | Pseudo R2   | = | 0.0081 |

  

|               | Odds Ratio | Std. Err. | z     | P> z  | [95% Conf. Interval] |          |
|---------------|------------|-----------|-------|-------|----------------------|----------|
| _Isexo_2      | .9068212   | .2635361  | -0.34 | 0.736 | .5130379             | 1.602854 |
| _Iedadgroup_2 | .6826432   | .2871479  | -0.91 | 0.364 | .2993252             | 1.556841 |
| _Iedadgroup_3 | .8349761   | .3022455  | -0.50 | 0.618 | .4107289             | 1.697434 |
| _Igruposani_2 | 1.66051    | .6133603  | 1.37  | 0.170 | .8050522             | 3.424987 |
| _Igruposani_3 | 1.588026   | .9717085  | 0.76  | 0.450 | .4786408             | 5.268723 |
| _IFormacion_1 | .7555854   | .678663   | -0.31 | 0.755 | .1299387             | 4.393681 |
| _cons         | .6509903   | .2618647  | -1.07 | 0.286 | .2959195             | 1.432107 |

### 1.3 CONOCEN PROTOCOLO DE ACTUACIÓN

```

. xi:logistic protocolo i.sexo i.edadgroup i.gruposanitario
i.sexo          _Isexo_1-2          (naturally coded; _Isexo_1 omitted)
i.edadgroup     _Iedadgroup_1-3     (naturally coded; _Iedadgroup_1 omitted)
i.gruposanita~o _Igruposani_1-3     (naturally coded; _Igruposani_1 omitted)
  
```

  

|                             |               |   |        |
|-----------------------------|---------------|---|--------|
| Logistic regression         | Number of obs | = | 286    |
|                             | LR chi2(5)    | = | 36.50  |
|                             | Prob > chi2   | = | 0.0000 |
| Log likelihood = -56.801976 | Pseudo R2     | = | 0.2431 |

  

|               | Odds Ratio | Std. Err. | z     | P> z  | [95% Conf. Interval] |          |
|---------------|------------|-----------|-------|-------|----------------------|----------|
| _Isexo_2      | 1.061636   | .6885566  | 0.09  | 0.927 | .2977847             | 3.784849 |
| _Iedadgroup_2 | 1.065632   | .9013558  | 0.08  | 0.940 | .2030604             | 5.592281 |
| _Iedadgroup_3 | .7931225   | .6078105  | -0.30 | 0.762 | .1766122             | 3.56172  |
| _Igruposani_2 | 21.96904   | 11.93388  | 5.69  | 0.000 | 7.575772             | 63.70821 |
| _Igruposani_3 | 7.30798    | 6.619345  | 2.20  | 0.028 | 1.23824              | 43.13102 |
| _cons         | .0279603   | .0260287  | -3.84 | 0.000 | .0045097             | .1733563 |

Alba González-Timoneda et al.  
 Knowledge, attitudes and practices of Primary Healthcare Professionals to Female Genital Mutilation in Valencia,  
 Spain: are we ready for this challenge?  
 HEALTHCARE PROFESSIONALS. RESULTS\_MULTIVARIATE ANALYSIS.

```
-----
. xi:logistic protocolo i.sexo i.edadgroup i.gruposanitario i.Formacion
i.sexo          _Isexo_1-2          (naturally coded; _Isexo_1 omitted)
i.edadgroup     _Iedadgroup_1-3     (naturally coded; _Iedadgroup_1 omitted)
i.gruposanita~o _Igruposani_1-3     (naturally coded; _Igruposani_1 omitted)
i.Formacion     _IFormacion_0-1     (naturally coded; _IFormacion_0 omitted)
```

```
Logistic regression                Number of obs   =       286
                                   LR chi2(6)         =       56.51
                                   Prob > chi2        =       0.0000
Log likelihood = -46.795944         Pseudo R2      =       0.3765
```

```
-----
      protocolo | Odds Ratio   Std. Err.      z    P>|z|    [95% Conf. Interval]
-----+-----
      _Isexo_2 | 1.138465    .8402416     0.18  0.861    .2679736   4.836678
  _Iedadgroup_2 | 1.003694    .8706428     0.00  0.997    .183331   5.494984
  _Iedadgroup_3 | .4451455    .3678913    -0.98  0.327    .0881099   2.248946
  _Igruposani_2 | 26.38863    16.80467     5.14  0.000    7.574588   91.93369
  _Igruposani_3 | 10.59454    10.24813     2.44  0.015    1.591153   70.54272
  _IFormacion_1 | 195.6429    263.8339     3.91  0.000    13.91802   2750.113
      _cons | .0236617    .0240983    -3.68  0.000    .0032147   .174162
-----
```
